# Supplementary material
Source: ML conference proceedings conference paper supplement (https://openaccess.thecvf.com/content/CVPR2025/html/Chen_USP-Gaussian_Unifying_Spike-based_CVPR_2025_paper.html)
Supplement: Supplementary file 1 [file Chen_USP-Gaussian_Unifying_Spike-based_CVPR_2025_supplemental.pdf]

# USP-Gaussian: Unifying Spike-based Image Reconstruction, Pose Correction and Gaussian Splatting

## Supplementary Material

### A. Introduction

In this supplementary material, we first analyze the gradient flow of our joint optimization framework in Appendix B, followed by a theoretical demonstration that the outputs of 3DGS and Recon-Net are complementary and the joint optimization strategy provides mutual benefits. Next, we present a more detailed comparison between our proposed framework and previous cascading frameworks in Appendix C. Further details regarding our implementation and network architecture can be found in Appendix D and Appendix E, respectively. Finally, in Appendix F, we provide additional quantitative and qualitative experimental results comparing our method with previous approaches from the perspective of the spike-to-image task.

### B. Theory Analysis

#### B.1. Gradient Flow

The total loss for our USP-Gaussian is defined in Eq. (14), formulated as follows:

$$\mathcal{L}_{\text{final}} = \mathcal{L}_{\text{rec}} + \mathcal{L}_{\text{gs}} + \mathcal{L}_{\text{joint}}. \quad (15)$$

In the following, we analyze the propagation of gradients for the final loss, depicted in Fig. 3, with respect to Gaussian primitives  $\mathbb{G}$ , Recon-Net parameters  $\theta$ , and poses  $\mathbb{P}$ .

The gradient of the final loss relative to the Gaussian primitives  $\mathbb{G}$  is expressed as:

$$\frac{\partial \mathcal{L}_{\text{final}}}{\partial \mathbb{G}} = \frac{\partial \mathcal{L}_{\text{gs}}}{\partial \mathbb{G}} + \frac{\partial \mathcal{L}_{\text{joint}}}{\partial \mathbb{G}} + \cancel{\frac{\partial \mathcal{L}_{\text{rec}}}{\partial \mathbb{G}}}, \quad (16)$$

$$\begin{cases} \frac{\partial \mathcal{L}_{\text{gs}}}{\partial \mathbb{G}} = \frac{\partial \mathcal{L}_{\text{gs}}}{\partial \mathbf{E}_{\text{gs}}(\mathcal{T})} \cdot \frac{1}{M} \sum_{m=1}^M \frac{\partial \mathbf{E}_{\text{gs}}(\mathcal{T})}{\partial \mathbf{I}_{\text{gs}}(t_m)} \frac{\partial \mathbf{I}_{\text{gs}}(t_m)}{\partial \mathbb{G}} \\ \frac{\partial \mathcal{L}_{\text{joint}}}{\partial \mathbb{G}} = \frac{1}{M} \sum_{m=1}^M \frac{\partial \mathcal{L}_{\text{joint}}}{\partial \mathbf{I}_{\text{gs}}(t_m)} \frac{\partial \mathbf{I}_{\text{gs}}(t_m)}{\partial \mathbb{G}} \\ \frac{\partial \mathcal{L}_{\text{rec}}}{\partial \mathbb{G}} = 0 \end{cases} \quad (17)$$

where  $\mathbf{E}_{\text{gs}}(\mathcal{T})$  denotes the blurry image synthesized by averaging the sequence projected by 3DGS during the interval  $\mathcal{T}$ .

The gradient of the final loss concerning the pose set  $\mathcal{P}$  is formulated as:

$$\frac{\partial \mathcal{L}_{\text{final}}}{\partial \mathbb{P}} = \frac{\partial \mathcal{L}_{\text{gs}}}{\partial \mathbb{P}} + \frac{\partial \mathcal{L}_{\text{joint}}}{\partial \mathbb{P}} + \cancel{\frac{\partial \mathcal{L}_{\text{rec}}}{\partial \mathbb{P}}} \quad (18)$$

$$= \frac{\partial \mathcal{L}_{\text{gs}}}{\partial \mathbb{G}} \frac{\partial \mathbb{G}}{\partial \mathbb{P}} + \frac{\partial \mathcal{L}_{\text{joint}}}{\partial \mathbb{G}} \frac{\partial \mathbb{G}}{\partial \mathbb{P}}. \quad (19)$$

Further details regarding the calculation of  $\frac{\partial \mathbb{G}}{\partial \mathbb{P}}$  can be referred to in BAD-Gaussian.

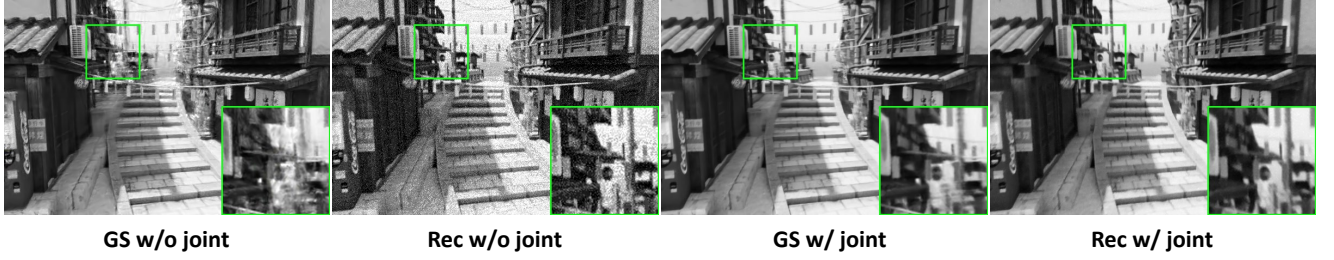

Figure 9. Image reconstruction visual ablation comparison of 3DGS and Recon-Net (with and without the joint optimization strategy).

The gradient of the final loss with respect to the parameters of the Recon-Net is:

$$\frac{\partial \mathcal{L}_{\text{final}}}{\partial \theta} = \frac{\partial \mathcal{L}_{\text{rec}}}{\partial \theta} + \frac{\partial \mathcal{L}_{\text{joint}}}{\partial \theta} + \cancel{\frac{\partial \mathcal{L}_{\text{gs}}}{\partial \theta}}, \quad (20)$$

$$\begin{cases} \frac{\partial \mathcal{L}_{\text{rec}}}{\partial \theta} = \frac{1}{N} \sum_{n=1}^N \frac{\partial \mathcal{L}_{\text{rec}}}{\partial \mathbb{I}_{\text{rec}}(M_n, \mathcal{T}_n)} \frac{\partial \mathbb{I}_{\text{rec}}(M_n, \mathcal{T}_n)}{\partial \mathbf{E}_{\text{rec}}(\mathcal{T}_n)} \cdot \frac{1}{M_n} \sum_{m=1}^{M_n} \frac{\partial \mathbf{E}_{\text{rec}}(\mathcal{T}_n)}{\partial \mathbf{I}(t_m^n)} \frac{\partial \mathbf{I}(t_m^n)}{\partial \theta} \\ \frac{\partial \mathcal{L}_{\text{joint}}}{\partial \theta} = \frac{1}{M} \sum_{m=1}^M \frac{\partial \mathcal{L}_{\text{joint}}}{\partial \mathbf{I}_{\text{rec}}(t_m)} \frac{\partial \mathbf{I}_{\text{rec}}(t_m)}{\partial \theta} \\ \frac{\partial \mathcal{L}_{\text{gs}}}{\partial \theta} = 0 \end{cases} \quad (21)$$

where  $\mathbf{E}_{\text{rec}}(\mathcal{T}_n)$  represents the blurry image obtained by averaging the sequence reconstructed by Recon-Net during the sub-interval  $\mathcal{T}_n$  and  $t_m^n$  denotes the timestamp of the  $m$ -th frame within exposure  $\mathcal{T}_n$ .

## B.2. Theorem: Effectiveness of the Joint Optimization Strategy

**Theorem.** *With our proposed collaborative optimization strategy, Spike-to-Image and 3D reconstruction tasks can mutually facilitate and enhance the optimization of each other.*

*Proof.* Let the 3DGS output be  $\mathbf{I}_{\text{gs}}$  and the Recon-Net output be  $\mathbf{I}_{\text{rec}}$ . Consider the scenario where 3DGS and Recon-Net are optimized independently, *i.e.*, supervised by their respective loss functions. When training converges, the following conditions hold:

$$\begin{cases} \frac{\partial \mathcal{L}_{\text{gs}}}{\partial \mathbf{G}} = 0, \\ \frac{\partial \mathcal{L}_{\text{gs}}}{\partial \mathbf{P}} = 0, \\ \frac{\partial \mathcal{L}_{\text{rec}}}{\partial \theta} = 0. \end{cases} \quad (22)$$

Building on the steady state of the optimization, Fig. 9 provides a visual comparison of 3DGS and Recon-Net under their respective optimization. The figure shows that outputs from 3DGS and Recon-Net exhibit distinct characteristics in texture details and noise levels. Specifically, 3DGS outputs display reduced texture detail but achieve restoration with minimal noise. In contrast, Recon-Net produces sharper textures but is accompanied by substantial noise artifacts.

We model the outputs of 3DGS and Recon-Net with the image degradation model, formulated as follows:

$$\begin{cases} \mathbf{I}_{\text{gs}} = A_{\text{gs}} \mathbf{I}_{\text{gt}} + n_{\text{gs}}, \\ \mathbf{I}_{\text{rec}} = A_{\text{rec}} \mathbf{I}_{\text{gt}} + n_{\text{rec}}, \end{cases} \quad (23)$$

where  $\mathbf{I}_{\text{gt}}$  denotes the corresponding ground truth image,  $A$  represents the degradation matrix and  $n$  denotes the noise. Based on our observations in Fig. 9, the relationship between the degradation matrix and noise intensity for 3DGS and Recon-Net can be expressed as:

$$\|A_{\text{gs}} - \mathbf{I}\|^2 > \|A_{\text{rec}} - \mathbf{I}\|^2, \quad \|n_{\text{gs}}\|^2 < \|n_{\text{rec}}\|^2, \quad (24)$$

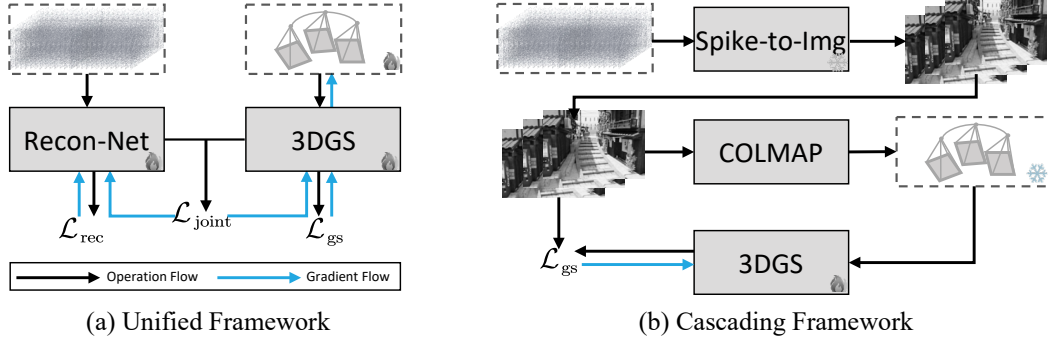

Figure 10. Framework comparison between our proposed unified optimization framework and previous cascading processing framework.

which indicates that 3DGS preserves structural details with less noise, while Recon-Net recovers sharper textures at the cost of higher noise intensity.

In the following, we aim to analyze the contribution of the joint optimization loss on the equilibrium state of 3DGS and Recon-Net, with the Eq. (22) re-formulated as:

$$\begin{cases} \frac{\partial \mathcal{L}_{gs}}{\partial \mathbb{G}} + \frac{\partial \mathcal{L}_{joint}}{\partial \mathbb{G}} = 0, \\ \frac{\partial \mathcal{L}_{gs}}{\partial \mathbb{P}} + \frac{\partial \mathcal{L}_{joint}}{\partial \mathbb{P}} = 0, \\ \frac{\partial \mathcal{L}_{rec}}{\partial \theta} + \frac{\partial \mathcal{L}_{joint}}{\partial \theta} = 0. \end{cases} \quad (25)$$

Minimizing the expectation of the final loss function across different views  $v$ , we can obtain the optimal parameters for 3DGS, pose, and Recon-Net, with the optimization objective defined as follows:

$$\mathbb{P}^*, \mathbb{G}^*, \theta^* = \arg \min_{\mathbb{P}, \mathbb{G}, \theta} \mathbb{E}_v [\mathcal{L}_{gs} + \mathcal{L}_{rec} + \|\mathbf{I}_{gs} - \mathbf{I}_{rec}\|^2] \quad (26)$$

$$= \arg \min_{\mathbb{P}, \mathbb{G}, \theta} \mathbb{E}_v [\mathcal{L}_{gs} + \mathcal{L}_{rec} + \|A_{gs}\mathbf{I}_{gt} - A_{rec}\mathbf{I}_{gt} + n_{gs} - n_{rec}\|^2] \quad (27)$$

$$= \arg \min_{\mathbb{P}, \mathbb{G}, \theta} \mathbb{E}_v [\mathcal{L}_{gs} + \mathcal{L}_{rec} + \|A_{gs} - A_{rec}\|^2 \mathbf{I}_{gt}^2 + 2(n_{gs} - n_{rec}) \odot (A_{gs} - A_{rec})\mathbf{I}_{gt} + \|n_{gs} - n_{rec}\|^2] \quad (28)$$

$$= \arg \min_{\mathbb{P}, \mathbb{G}, \theta} \mathbb{E}_v [\mathcal{L}_{gs} + \mathcal{L}_{rec} + \|A_{gs} - A_{rec}\|^2 \mathbf{I}_{gt}^2 + \|n_{gs} - n_{rec}\|^2] \quad (29)$$

$$= \arg \min_{\mathbb{P}, \mathbb{G}, \theta} \mathbb{E}_v [\mathcal{L}_{gs} + \mathcal{L}_{rec} + \|A_{gs} - A_{rec}\|^2 \mathbf{I}_{gt}^2 + n_{rec}^2]. \quad (30)$$

The transition from Eq. (26) to Eq. (27) involves substituting the degradation model into the optimization objective. Moving from Eq. (27) to Eq. (28), the squared terms are expanded. From Eq. (28) to Eq. (29), the cross-term is ignored due to the zero-mean property of the noise. Finally, the step from Eq. (29) to Eq. (30) assumes that the noise intensity  $n_{gs}$  is negligible, and the cross-term is omitted due to its zero-mean distribution.

For 3DGS, we extract the optimization objective for updating the Gaussian parameters and poses as:

$$\mathbb{P}^*, \mathbb{G}^* = \arg \min_{\mathbb{P}, \mathbb{G}} \mathbb{E}_v [\mathcal{L}_{gs} + \|A_{gs} - A_{rec}\|^2 \mathbf{I}_{gt}^2]. \quad (31)$$

This optimization objective aligns the degradation matrix of 3DGS with that of Recon-Net. Since  $A_{rec}$  typically exhibits weaker degradation, the alignment enhances the texture recovery capability of 3DGS.

For Recon-Net, the optimization target related to the network parameters  $\theta$  is:

$$\theta^* = \arg \min_{\theta} \mathbb{E}_v [\mathcal{L}_{rec} + \|A_{gs} - A_{rec}\|^2 \mathbf{I}_{gt}^2 + n_{rec}^2]. \quad (32)$$

This objective aligns the degradation matrices of 3DGS and Recon-Net while minimizing the noise intensity of the Recon-Net outputs. Although this may slightly degrade  $A_{rec}$ , the resulting noise reduction significantly enhances overall performance.

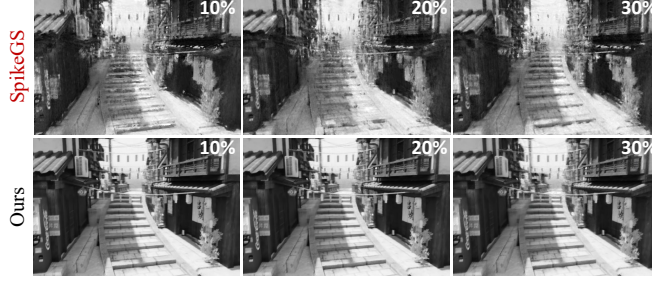

Figure 11. Visual comparison of our method with SpikeGS under inaccurate initial poses.

To sum up, the joint optimization of 3DGS and Recon-Net promotes complementary information exchange, as illustrated in Fig. 9. Specifically, the collaborative optimization enhances the texture details in the images reconstructed by 3DGS and suppresses noise in the images recovered by Recon-Net.

### C. Framework Comparison

We further elaborate on the main difference between our proposed unified optimization framework and previous cascading frameworks, as illustrated in Fig. 10. Previous methods such as Spk2ImgNet-3DGS, and SpikeGS adopt the framework shown in Fig. 10 (b), where a spike-to-image network is pre-trained to obtain high-quality image representations from the spike input. The subsequent processing follows the standard 3DGS pipeline, where the reconstructed image sequence is fed into COLMAP to estimate camera poses, which are further utilized to supervise the 3DGS training.

To address the potential issue of error propagation in cascading frameworks, we propose the joint optimization framework as shown in Fig. 10 (a), which not only eliminates cascading errors but also leverages the complementary information provided by outputs of the 3DGS and Recon-Net to mutually enhance optimization, as demonstrated by our experiments and theoretical analysis.

### D. Implementation

We extract 137 spike frames per viewpoint, with 97 frames employed to derive the long-exposure image specified in Eq. (9). The remaining 20 frames at the beginning and end are designated for generating the short-exposure spike streams corresponding to the initial and final pose images. We set  $M = 13$ , enabling each viewpoint to reconstruct a temporally uniform sequence of 13 frames. Our approach is implemented based on the BAD-Gaussian framework, with the Adam optimizer applied to optimize Recon-Net, pose estimations, and 3DGS parameters. All comparative analyses and ablation studies are performed on a single NVIDIA RTX 4090 GPU and an AMD EPYC 7742 64-Core Processor within the PyTorch framework. Besides, we employ the widely used metrics PSNR, SSIM, and LPIPS metrics to perform quantitative analysis.

### E. Network Architecture

Our proposed Recon-Net employs a complementary long-short spike input format. The short-spike stream captures detailed motion features and rich textures, while the long-spike stream provides essential scene-level textural information, effectively reducing noise embedded in the short-spike stream.

The network architecture is illustrated in Fig. 3. Specifically, the short-spike input comprises 41 frames of binary 0-1 spikes, while the long-spike input is voxelized by partitioning 137 input spike frames into groups of four, aggregating each group (with intermediate frames omitted), resulting in 34 voxel frames. Features from the short-spike and voxelized long-spike inputs are extracted and channel-aligned through an initial pre-processing convolutional layer. These aligned features are subsequently fused with the time index via a summation operation, enabling the integration of temporal and spatial information. Finally, the fused representation is passed through a sequence of convolutional blocks to extract deeper features, culminating in the reconstruction of the output image.

### F. Experimental Details

We present further 3D reconstruction visual comparison results between our proposed method and previous methods on the synthetic dataset as shown in Fig. 12, with the visual comparison on the inaccurate initial poses dataset depicted in ??.



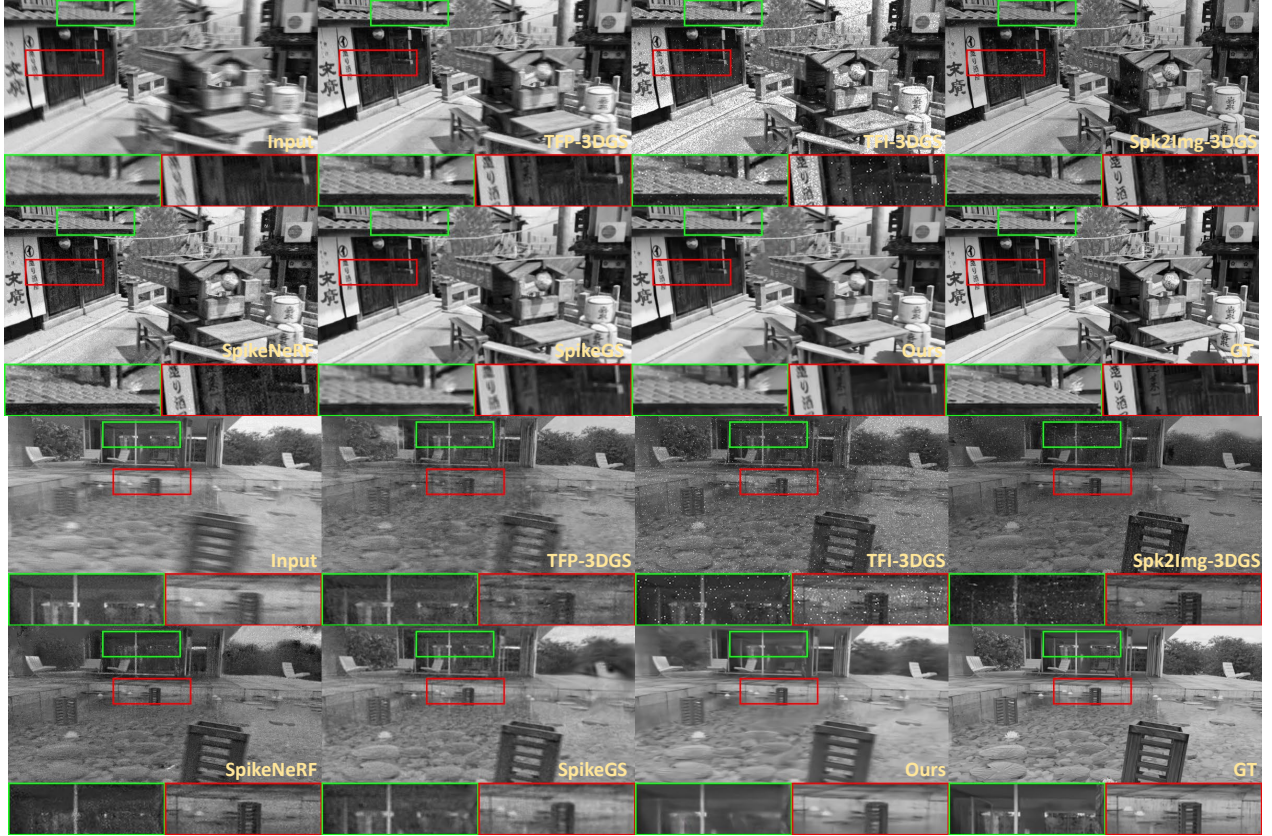

Figure 12. 3D reconstruction visual comparison of our USP-Gaussian compared with previous methods on the synthetic dataset, where the input is the long-exposure image defined in Eq. (6).

Table 5. Spike-to-Image reconstruction quantitative comparison on the synthetic dataset.

| Methods    | Wine   |       |       | Tanabata |       |       | Factory |       |       | Outdoor Pool |       |       | Average |       |       |
|------------|--------|-------|-------|----------|-------|-------|---------|-------|-------|--------------|-------|-------|---------|-------|-------|
|            | PSNR   | SSIM  | LPIPS | PSNR     | SSIM  | LPIPS | PSNR    | SSIM  | LPIPS | PSNR         | SSIM  | LPIPS | PSNR    | SSIM  | LPIPS |
| TFP        | 23.174 | 0.637 | 0.403 | 23.951   | 0.630 | 0.444 | 26.794  | 0.684 | 0.332 | 28.101       | 0.633 | 0.495 | 24.100  | 0.614 | 0.394 |
| TFI        | 20.368 | 0.537 | 0.563 | 19.415   | 0.460 | 0.678 | 22.067  | 0.561 | 0.530 | 22.694       | 0.471 | 0.758 | 20.001  | 0.484 | 0.594 |
| Spk2ImgNet | 20.443 | 0.688 | 0.291 | 19.853   | 0.653 | 0.364 | 22.905  | 0.651 | 0.376 | 23.566       | 0.504 | 0.652 | 20.513  | 0.599 | 0.388 |
| SpikeNeRF  | 23.909 | 0.598 | 0.411 | 24.242   | 0.562 | 0.473 | 25.252  | 0.585 | 0.407 | 25.478       | 0.477 | 0.615 | 23.446  | 0.532 | 0.446 |
| SpikeGS    | 24.981 | 0.764 | 0.263 | 25.810   | 0.767 | 0.290 | 28.298  | 0.794 | 0.192 | 29.443       | 0.759 | 0.323 | 25.661  | 0.733 | 0.251 |
| Ours       | 27.138 | 0.855 | 0.178 | 27.539   | 0.834 | 0.222 | 29.434  | 0.849 | 0.173 | 31.154       | 0.833 | 0.255 | 27.259  | 0.801 | 0.194 |

Additionally, we conduct quantitative and qualitative comparisons of USP-Gaussian and previous approaches on the spike-to-image task as shown in Fig. 12 and Tab. 5. The spike-based image reconstruction methods for TFP-3DGS, TFI-3DGS, and Spk2ImgNet-3DGS correspond to TFI, TFI, and Spk2ImgNet respectively. SpikeNeRF reconstructs spike frames based on the accumulated spike input, while SpikeGS reconstructs initial images based on the BSN.

The quantitative performance comparison is described in Tab. 5 and the visual comparison is depicted in Fig. 12. Specifically, Long-TFP corresponds to reconstructing the image accumulated over 97 frames, and Short-TFP corresponds to those accumulated over 41 frames. From the visual comparison, it can be observed that supervised method Spk2ImgNet suffers from performance degradation due to the dataset domain gap and the self-supervised method in SpikeGS heavily relies on the BSN, which leads to significant artifacts when the input spike stream embodies a high signal-to-noise ratio and rich image details.

In contrast, our proposed USP-Gaussian achieves joint optimization while simultaneously training the Recon-Net, thereby introducing a novel self-supervised spike-based image reconstruction framework. Leveraging the multi-view constraint provided by 3DGS, our method demonstrates superior self-supervised image reconstruction performance.



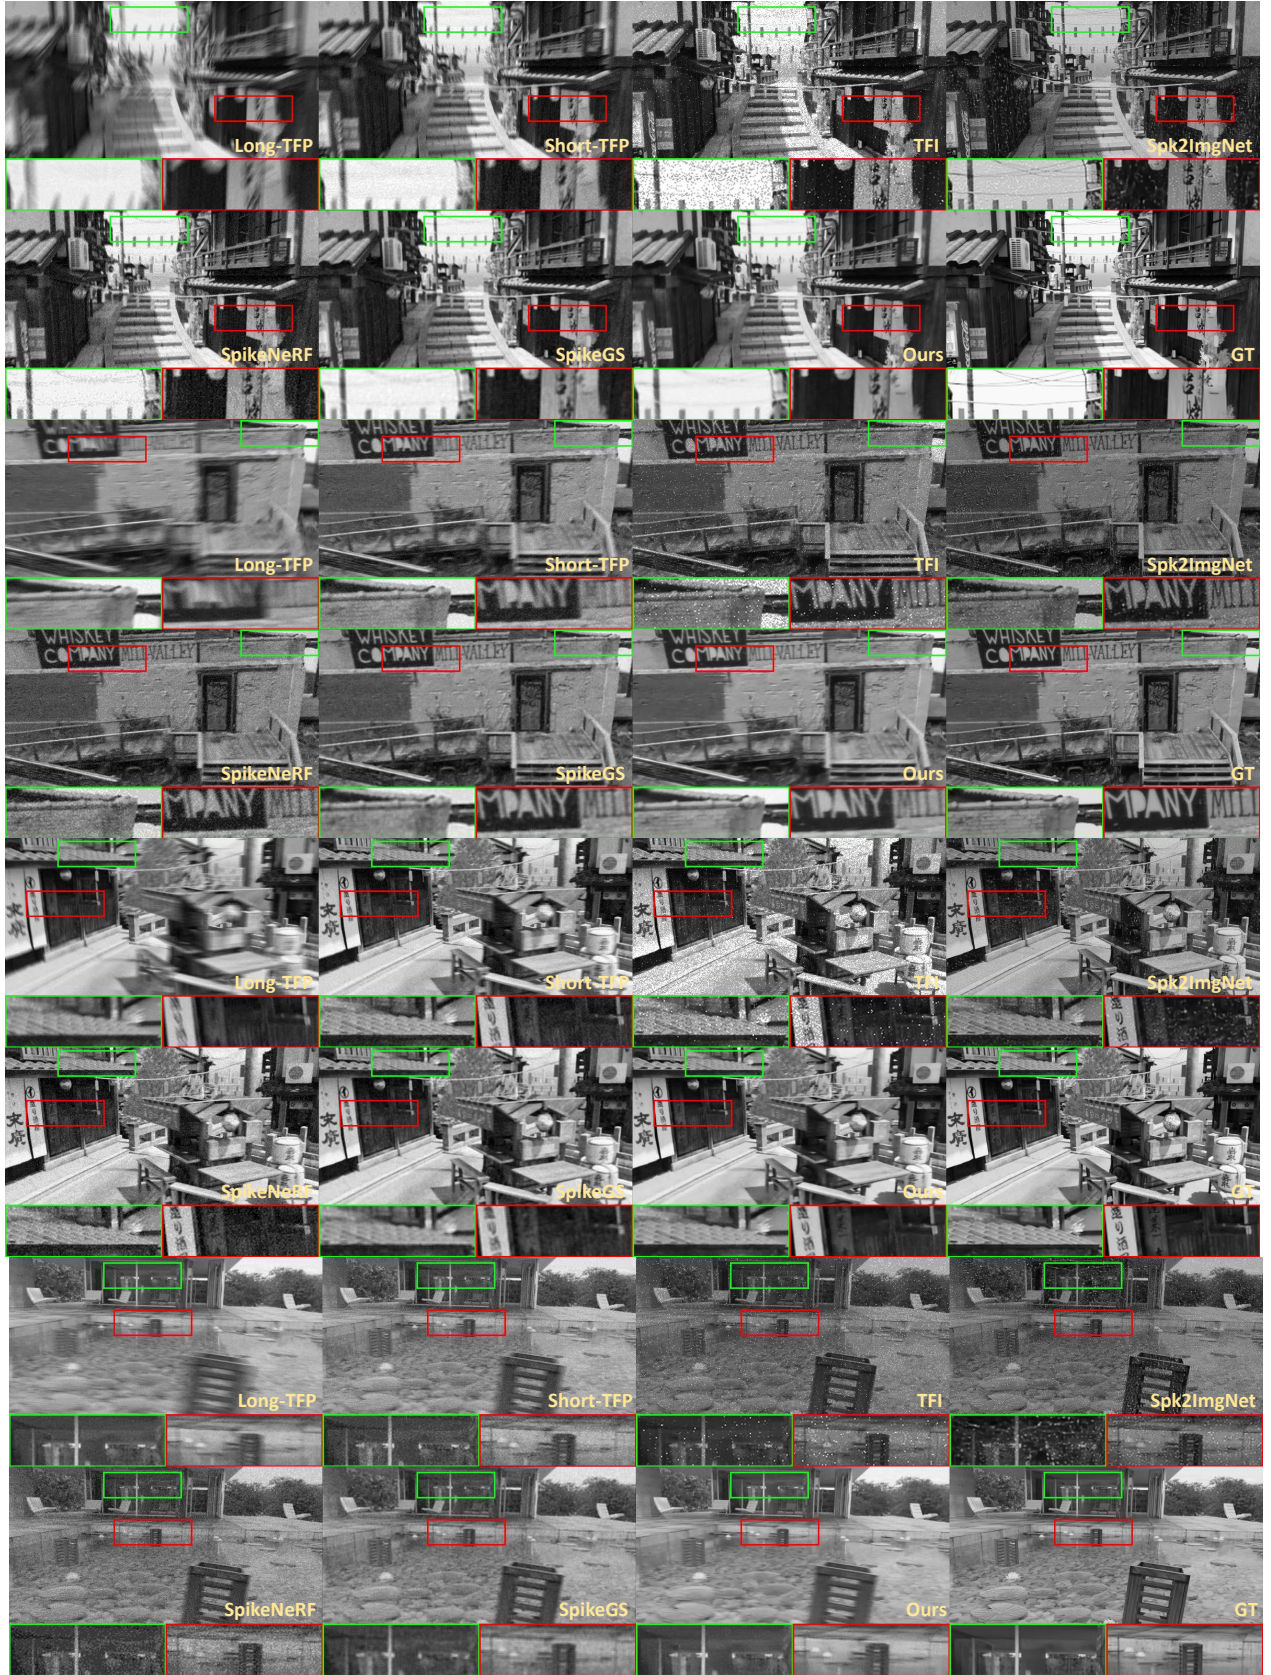

Figure 13. Spike-to-image reconstruction comparison of our USP-Gaussian compared with previous methods on the synthetic dataset.
